**Title:** Visual modelling supports the potential for prey detection by means of diurnal active photolocation in a small cryptobenthic fish

**Authors:** Pierre-Paul Bitton<sup>1\*</sup>, Sebastian Alejandro Yun Christmann, Matteo Santon, Ulrike K. Harant, Nico K. Michiels

**Affiliations:** Institute of Evolution and Ecology, Faculty of Science, Eberhard Karls Universität Tübingen, Auf der Morgenstelle 28, 72076 Tübingen, Germany

<sup>1</sup>Current address: Department of Psychology, Memorial University of Newfoundland, 232 Elizabeth Avenue, St. John's, NL A1B 3X9, Canada

**E-mail:** Pierre-Paul Bitton: [pierre-paul.bitton@uni-tuebingen.de](mailto:pierre-paul.bitton@uni-tuebingen.de)

**Word count:**

**Manuscript elements:** Figures = 4

Tables = 0

**Supplemental Information** = 1 Table, and 2 Figures

1 Active sensing has been well documented in animals that use echolocation and electrolocation. Active  
2 photolocation, or active sensing using light, has received much less attention, and only in  
3 bioluminescent nocturnal species. However, evidence has suggested the diurnal triplefin *Tripterygion*  
4 *delaisi* uses controlled iris radiance, termed ocular sparks, for prey detection. While this form of diurnal  
5 active photolocation was behaviourally described, a study exploring the physical process would provide  
6 compelling support for this mechanism. In this paper, we investigate the conditions under which diurnal  
7 active photolocation could assist *T. delaisi* in detecting potential prey. In the field, we sampled  
8 gammarids (genus *Cheirocratus*) and characterized the spectral properties of their eyes, which possess  
9 strong directional reflectors. In the laboratory, we quantified ocular sparks size and their angle-  
10 dependent radiance. Combined with environmental light measurements and known properties of the  
11 visual system of *T. delaisi*, we modeled diurnal active photolocation under various scenarios. Our results  
12 corroborate that diurnal active photolocation should help *T. delaisi* detect gammarids at distances  
13 relevant to foraging, 4.5 cm under favourable conditions and up to 2.5 cm under average conditions.  
14 Because ocular sparks are widespread across fish species, diurnal active photolocation for micro-prey  
15 may be a common predation strategy.

# Introduction

Active sensory systems have been well studied in several animals. For example, the echolocating behavior of bats, by which the reflection of emitted sound waves contributes to navigation in the dark, has been detailed since 1938<sup>1,2</sup>, and active electrolocation, by which the disruptions of weak electrical fields are used to detect potential prey and predators, is well known from model organisms such as the electric fish *Apteronotus leptorhynchus*<sup>3,4</sup>. In contrast, active photolocation, the process by which organisms actively use light to survey their environment, seems limited to bioluminescent organisms; only deep-sea dragonfish (family Stomiidae), lanternfish (family Myctidae), and nocturnal flashlight fish (family Anomalopidae) are assumed to use active photolocation<sup>5-7</sup>. However, recent evidence suggests that active photolocation, by controlled light redirection, could also be used in diurnal fish to assist in prey detection, and may be generally common across fish species<sup>8</sup>.

Michiels et al.<sup>8</sup> described a mechanism that allows the triplefin *Tripterygion delaisi* to redirect ambient light by taking advantage of its laterally protruding lenses and reflective irides, and discussed how this may assist in the detection of camouflaged micro-prey. The central basis of the mechanism is that downwelling light strikes the dorsal part of the eye, is focused by the protruding lens onto the iris below the pupil, and is reflected in the horizontal plane of vision. The focussed light can be radiated by the red fluorescent section of the iris producing a 'red ocular spark', reflected by a blue-white area below the pupil generating a 'blue ocular spark' (**Fig. 1**), or turned on and off by rotating and tilting the iris (see Fig. 2 in <sup>8</sup>). Their experiments demonstrated that the absence/presence and type of sparks (red and blue) depends on the environmental context, and is under voluntary control<sup>8</sup>. Because downwelling light in the aquatic environment is many times more intense than sidewelling light<sup>9,10</sup>, blue ocular sparks are brighter than the background. Michiels et al.<sup>8</sup> emphasized that ocular sparks are too weak to illuminate an entire scene, but suggested they may be sufficiently radiant to reveal strong and/or directional reflectors in nearby target organisms.

Indeed, strongly reflecting structures are abundant in aquatic ecosystems, specifically in the eyes of both vertebrates and invertebrates<sup>11-14</sup>. For example, camera eyes that possess either a *tapetum lucidum* or *stratum argenteum* are retroreflective, and produce the eyeshine observed when illuminating nocturnal animals. This type of reflected eyeshine is only perceived if the illuminating source is coaxial to the receiver's eye because most of the light is returned to the source in a narrow angle. Furthermore, invertebrates such as stomatopod larvae also possess strong reflectors considered to camouflage their opaque retinas<sup>12</sup>. Though not true retroreflectors, the reflectance of marine invertebrate compound eyes is often stronger with a coincident normal viewing geometry i.e., coaxial alignment<sup>8,12,15</sup>. Strong directional reflectors and coaxially generated illumination are key components of the mechanism proposed by Michiels et al.<sup>8</sup> because the ocular sparks are produced on the irides, immediately adjacent to the pupil. Thus, ocular sparks could make use of the reflectance of prey eyes to increase the probability of detection, as has been suggested for nocturnal, bioluminescent species<sup>15-17</sup>.

The experiment reported in Michiels et al.<sup>8</sup> was conducted in the laboratory and focused on ocular spark modulation in response to prey presence and background hue. No studies have yet explored the physical and theoretical basis of the complete process to describe the conditions under which ocular sparks could assist triplefins in detecting prey in natural contexts. In this study, we use simple mathematical expressions and visual modelling to determine the conditions that would enable triplefins to benefit from blue ocular sparks for prey detection. In the field, we collected measurements of ambient light and characterised the reflective properties of a background in which gammarids (Crustacea: Amphipoda), important triplefin prey items<sup>18,19</sup>, are found. In the laboratory, we measured the ocular spark properties of *T. delaisi* and the optical properties of the eyes and bodies of gammarids. Finally, we combined these data with *T. delaisi*'s species-specific visual system characteristics<sup>20</sup> to inform models of visual interactions between *T. delaisi* and gammarids while varying influential parameters.

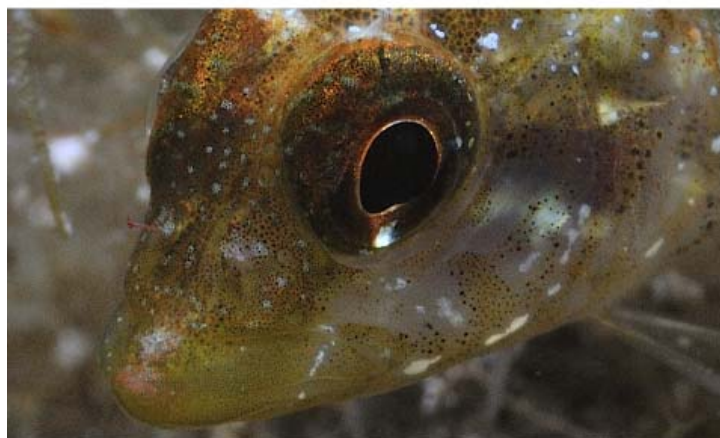

**Figure 1.** The triplefin *Tripterygion delaisi* produces blue ocular sparks (bright area ventral to the pupil) by focussing downwelling light onto blue chromatophores. This downwelling light is reflected equally in all directions (See Fig. 2). Photo credit: Nico K. Michiels

## Materials and Methods

The yellow black-faced triplefin *Tripterygion delaisi* is a small benthic fish found along Mediterranean and eastern Atlantic coasts<sup>21</sup>. It lives in rocky habitats between 5 and 50 m depth where it feeds mainly on small benthic invertebrates<sup>18,22</sup>. We study them at the Station de Recherches Sous-marines et Océanographiques (STARESO) in Calvi (Corsica, France), where our preliminary investigations suggest that their preferred food items include gammarids, caprellids, copepods, and decapods (Fritsch and Michiels, unpublished data). Microscopy investigations have shown that almost all of these possess strong reflectors in their eyes (Bitton, Fritsch and Michiels, unpublished data), which concurs with the existing literature on aquatic invertebrates<sup>11,12,23-27</sup>. Triplefins are highly cryptic against their natural background with no obvious sexual dimorphism, except during the breeding season when males acquire dark heads and yellow bodies.

## Field light environments and background reflectance

We measured the reflective properties of *Halopteris filicina*, a common foraging substrate for *T. delaisi*, and the downwelling light, unshaded sidewelling light, and shaded sidewelling light of triplefin habitat at STARESO in June-July 2014 and 2017. Details of *Halopteris filicina* data collection protocol can be found in Harant et al.<sup>19</sup>. In short, substrate data were collected while scuba diving at a shallow site (5 m) characterized by rocky slopes, steep walls and granite boulders. Measurements were obtained at various locations in conjunction with a polytetrafluorethylen (PTFE) diffuse white standard (DWS; Berghof Fluoroplastic Technology GmbH, Eningen unter Achalm, Germany) tilted at 45° to the surface as a combined measure of downwelling and sidewelling light. The relative radiance between the substrate measurements and light field is considered as the reflective property of *Halopteris filicina*. Light field measurements were obtained between 2 and 30 m depth on substrates facing south. At each depth (2, 4, 6, 8, 10, 14, 18, 24, and 30 m) we measured from a 45° angle the radiance of an exposed PTFE standard set at normal incidence to the water surface (= angle of incidence 0°) for an approximation of downwelling light, from a PTFE standard set at 90° to normal for measuring sidewelling light, and a PTFE standard set at 90° to normal and shaded by a 4 cm opaque black cover as a measure of shaded sidewelling light environment. Three measurements were obtained for every standard at every depth and averages used in analyses. All measurements were obtained using a SpectraScan® PR-740 (PhotoResearch Inc., Syracuse, USA) fixed at a focal distance of 50 cm in a custom-built underwater housing (BS Kinetics, Achern, Germany). The SpectraScan spectroradiometers use Pritchard optics to collect measurements of absolute radiance from a specific solid angle, which is visualized as a small black circular area in the viewfinder. The PR-740 was equipped with a colour correction filter (#287 double CT orange, LEE Filters, Andover, England) which suppresses but does not block the dominant blue-green spectral range. This increases exposure time, allowing the instrument to obtain better readings in the weak, long-wavelength part of the spectrum at depth. Radiance measurements were

corrected for the transmission profile of the filter and port of the housing before being used in the calculations.

# *Properties of gammarids*

We isolated gammarids from *Halopteris filicina* algae collected between 5 and 10 m depth at STARESO, and kept them immobilized but alive using a 0.6 M MgCl<sub>2</sub> solution. Spectral measurements of their body and compound eye were obtained with a PR-740 spectroradiometer mounted onto a Leica DM5000 B compound microscope (Leica Microsystems, Wetzlar, Germany) under 10 × 10 magnification. For reflectance measurements, we used an external halogen light source (KL2500 LCD, Schott AG, Mainz, Germany), either coincident through the microscope's housing (epi-illumination) or at 45° to the sample using an external LLG 380 liquid light guide (Lumatec GMBH, Germany). For each gammarid we collected five body and eye reflectance measurements coaxially illuminated, and five measurements of eyes illuminated at 45° relative to the optical axis. We did not collect body reflectance at 45° because there was no evidence of specularly or iridescence. The measurement area covered almost the entire gammarid eye under 10 x 10 magnification. A submerged PTFE standard was also measured under comparable geometries five times both with coaxial epi-illumination and with the light source at 45°. In all cases, the sample was repositioned and refocused before each measurement. Averages of 5 measurements of the body and eyes were expressed in relation to their relative standard. For transmission measurements we used the 12 V 100 W halogen lamp provided with the microscope in the transmitted light axis. For each gammarid, we took five radiance measurements of the transmitted light as seen through haphazardly selected locations on the body (plus Petri dish and MgCl<sub>2</sub> solution) and five reference measurements of the transmitted light without the gammarid (but including the Petri dish and MgCl<sub>2</sub> solution). Transmittance was then determined as the mean of the five measurements of the body

divided by the reference. Scaled images of the gammarids (full length 3 – 4 mm) were also obtained at this time and the size of the eyes subsequently measured using ImageJ<sup>28</sup>.

# *Properties of ocular sparks*

Radiance of the blue ocular spark was measured in live fish and the results are reported in Michiels et al.<sup>8</sup>. In short, individual fish ( $n = 5$ ) were held in a small tank ( $L \times W \times H = 10 \times 6 \times 4 \text{ cm}^3$ ) in a dark room, illuminated from above through means of a liquid light guide attached to a broad-spectrum EL 6000 source (Leica Microsystems, IL USA). The radiances of sparks and a Spectralon diffuse white reflectance standard (SRS-99-010; Labsphere Inc, NH USA) were measured with a calibrated SpectraScan® PR-670 spectroradiometer (PhotoResearch Inc, NY USA). The reflectance of the spark was calculated as the quotient of the spark radiance divided by the radiance of the white standard for every fish. To determine if the radiance of ocular sparks is equal in all directions, we collected angle-resolved measurements by securing whole triplefins, previously sacrificed by severing the spinal cord, in the center of a platform in a stainless-steel hemisphere of 15 cm diameter placed on a PVC ring holder inside a 7 l Plexiglass® cylinder filled with fresh marine Ringer-solution. The reflective chromatophore patch responsible for generating the sparks was positioned at the exact center of the hemisphere, which was also the exact center of the cylinder, allowing measurements normal to the cylinder wall at all angles. Sparks were generated by means of a stage lamp (ARRI® 650 Plus) mounted ~1.5 m above the fish. To avoid ambient light effects, the room was kept dark. For each of 12 fish, the radiance of the ocular spark was measured with a PR-740 fitted with an MLH-10X lens (Computar®) at each 10° between 10° (anteriorly) and 150° (posteriorly) in relation to the frontal-caudal axis of the fish's body (**Fig. 2**). These values were expressed relative to the radiances of a PTFE diffuse white standard measured at the same angles and position immediately after each fish. The range of angles was not covered for all fish explaining why the sample size varied between angles (**Fig. 2**). Because the lens' resting state following



death is slightly retracted, these measurements could only be used for comparing relative radiance at various angles, but not for estimating relative spark radiance in relation to the illuminant. The size of the ocular spark ( $n = 10$ ) and pupil ( $n = 35$ ) were determined on live fish in a small chamber from scaled images analysed using ImageJ<sup>28</sup>. The light conditions in this small chamber was the same as that described above.

### *Active photolocation of the gammarid eye*

We modeled three-dimensional interactions between triplefins and gammarids, assuming they were both on the same horizontal plane, and that their eyes were positioned at normal incidence. We calculated the photon flux of the reflective eye of the gammarid, as perceived by the triplefin, with and without the contribution of the blue ocular spark, by describing the interaction in simple equations (see complete calculation details in SI). A detectable change in gammarid eye radiance, by switching the ocular spark on and off or through movement of the gammarid eye, would help the triplefin detect potential prey items. In short, the photon flux of the gammarid eye without the contribution of the spark reaching the triplefin retina was determined by the sidewelling light reflected by the ocular reflectors (non-coaxial), the solid angle subtended by the gammarid eye (in steradians) as perceived by the triplefin as a function of the distance between the two eyes, and the area of the triplefin pupil as the ultimate receptor area. The photon flux due to the ocular spark returned to the triplefin was further determined by the radiance of the ocular spark, the solid angle of the ocular spark (in steradians) from the perspective of the gammarid eye, and the coaxial reflective properties of the gammarid's ocular reflectors. Because solid angle calculations are only possible when the receiver is defined as a infinitely small point in space, not a disc as the pupil of fish or eye of invertebrates, all solid angles were estimated using Monte Carlo simulations<sup>29</sup>.

In each model iteration, we used fixed mean values for parameters that had little influence on the results, based on preliminary sensitivity analyses. We set the gammarid eye radius at 0.0625 mm, the triplefin pupil radius at 0.78 mm, used the downwelling light profile measured at 10 m, the mean background substrate reflectance (*Halopteris filicina*), and the mean reflectance and transmittance of the gammarid body. We explored the parameter space of the possible prey-predator interactions by varying four factors that were determined to have the most influence on the contrast generated by the ocular spark in the gammarid eye (further details in SI).

- 1) **Spark size:** Because the photon flux that reaches the gammarid eye is directly related to the solid angle subtended by the ocular spark, we varied its radius equivalent on a continuous scale from 0.09 to 0.25 mm.
- 2) **Spark relative radiance:** The photon flux reaching the gammarid eye is also proportional to the relative radiance of the ocular spark so we varied it on a continuous scale from a mean area under the 400 to 700 nm curve of 0.63 to 2.09.
- 3) **Gammarid eye reflectance:** The overall radiance of the gammarid eye results from the combined reflection of coaxial and non-coaxial illumination. The non-coaxial component is used to estimate how bright the eye is under the prevailing conditions, without the addition of an ocular spark; the coaxial reflectance is used to calculate the additive contribution of light coming from the ocular spark. We evaluated the impact of the relationship between the coaxial and non-coaxial reflectance of gammarid ocular reflectors using three categories: large difference (non-coaxial reflectance is 9.87 times weaker than coaxial reflectance; maximum observed), average difference (4.09 times weaker), and small difference (2.68 times weaker; minimum observed).
- 4) **Shading of prey:** Finally, redirecting downwelling light into the horizontal plane would allow triplefins to generate greater contrasts with greater shading of prey, while the triplefin remains exposed to the same downwelling light. We investigated the influence of prey shading using four

categories: no shade, weakly shaded, average shade, and strongly shaded. The ‘no shade’ was calculated as the average of the non-shaded sidewelling light measurements divided by the average downwelling light, and the three shaded categories were calculated as the minimum, average, and maximum observed shaded sidewelling light measurements divided by the average downwelling light across the depth gradient described above.

For each set of conditions, we calculated the maximum distance over which active photolocation can contribute to prey detection by calculating the chromatic and achromatic contrast between the gammarid eye with and without the radiance induced by a blue ocular spark as perceived by the triplefin at different distances (range 0.5 – 4.5 cm), and by comparing these values with specific chromatic and achromatic contrast thresholds. The range of distances used is relevant to triplefin feeding behaviour; our own preliminary data from triplefin strikes at prey video-recorded in the wild suggest an average strike distance of 1.31 cm (SD = 0.83 cm, 0.1 – 0.9 quantiles = 0.5 – 2.18 cm,  $n = 107$  strikes; Neiß and Michiels unpublished data). Furthermore, the spatial resolution of *T. delaisi* is conservatively estimated at 6 cycles/degree<sup>30</sup> which means that the average gammarid eye diameter (0.125 mm) becomes a point source at ~48 mm. To avoid modelling situations in which the gammarid eye is smaller than the smallest detectable point in space by a triplefin, we limited the distance between the triplefin and the gammarid to a maximum of 45 mm. The minimum distance modelled relied on estimates of the distance of nearest focus (~5 mm; based on calculations in <sup>30</sup>).

### *Calculation of chromatic and achromatic contrasts*

Using retinal quantum catch estimations based on calculated photon flux, we calculated the chromatic and achromatic contrasts between the radiance of the gammarid eye with (photon flux<sub>1</sub>) and without (photon flux<sub>2</sub>) the contribution of the ocular spark radiance. For chromatic contrast calculations we used the receptor-noise limited model<sup>31</sup> parameterized using triplefin-specific visual characteristics<sup>20,30</sup>. In

short, we used species-specific ocular media transmission values, photoreceptor sensitivity curves based on the single cone (peak at 468 nm), and the double cone (peaks at 517 and 530 nm) following a vertebrate photoreceptor-template<sup>32</sup>, and a relative photoreceptor density of single to double cones set at 1:4 as found in the triplefin fovea<sup>30</sup>. Since the Weber fraction ( $w$ ) for colour contrast is not known for fish, we used a value of 0.05 as in previous studies from other groups<sup>33,34</sup>. Chromatic contrast calculations result in measures of just-noticeable differences (JNDs), where values above one are considered to represent the minimum discernable differences between the quantum catches. We calculated the Michelson achromatic contrast as  $(Q_1 - Q_2)/(Q_1 + Q_2)$ , where  $Q_1$  and  $Q_2$  are the quantum catches of the two members of the double cones which are associated with the achromatic channel, under photon flux<sub>1</sub> and photon flux<sub>2</sub> respectively. We used two different achromatic contrast threshold values: an optimistic value of 0.008, which was empirically demonstrated in *T. delaisi* using an optokinetic reflex paradigm<sup>35</sup>, followed by conservative calculations using 0.024<sup>36</sup>. The conservative value used is similar to that found in *Carassius auratus*<sup>37</sup>, *Scardinius erythrophthalmus*<sup>38</sup>, *Gadus morhua*<sup>39</sup>, and *Lepomis macrochirus*<sup>40</sup>. To ensure that the contrasts generated by the ocular spark was only influencing the radiance of the gammarid eye and not the background, we performed the same calculations for the gammarid body.

### *Calculation of maximum discernable distance*

For each set of model conditions defined in the sections above we determined the maximum discernable distance of the ocular spark radiance reflected by the gammarid eye. This was achieved by calculating the chromatic and achromatic contrasts at each millimeter between 5 and 45 mm per set of conditions, and extracting the first value at which the chromatic contrast was equal to or exceeding 1.0 JND, and achromatic contrast equal or exceeding 0.008 for optimistic models, and equal or exceeding 0.024 for conservative models (SI Fig. S2).

246

# 247 *Animal care and permits*

248 Fish were caught at STARESO between 5 and 20 m depth using hand nets while scuba diving in  
 249 accordance with the station's general scientific permit. During dives, fish were transported in 50 ml  
 250 perforated Falcon™ tubes (Corning Inc, NY, USA) to permit water exchange. At the field station the fish  
 251 were held in a 50 L flow-through tank at ambient water temperature, until transferred to facilities at the  
 252 University of Tübingen, Germany. In these facilities, individuals were kept separately in 15 L flow-  
 253 through tanks (18°C, salinity 34‰, pH 8.2, 12 L: 12 D light cycle) and fed once per day. The fish were  
 254 sacrificed under approved permit 'Mitteilung 29.10.2014' from the Regierungspräsidium (Referat 35,  
 255 Konrad-Adenauer-Str. 20, 72072 Tübingen) under the supervision of the animal welfare officer.

# 256 *Data archival*

257 All data used in the analyses and preparation of figures will be made available on Dryad upon  
 258 acceptance, and are available (along with R scripts) to the editors and reviewers during the evaluation  
 259 process.

260

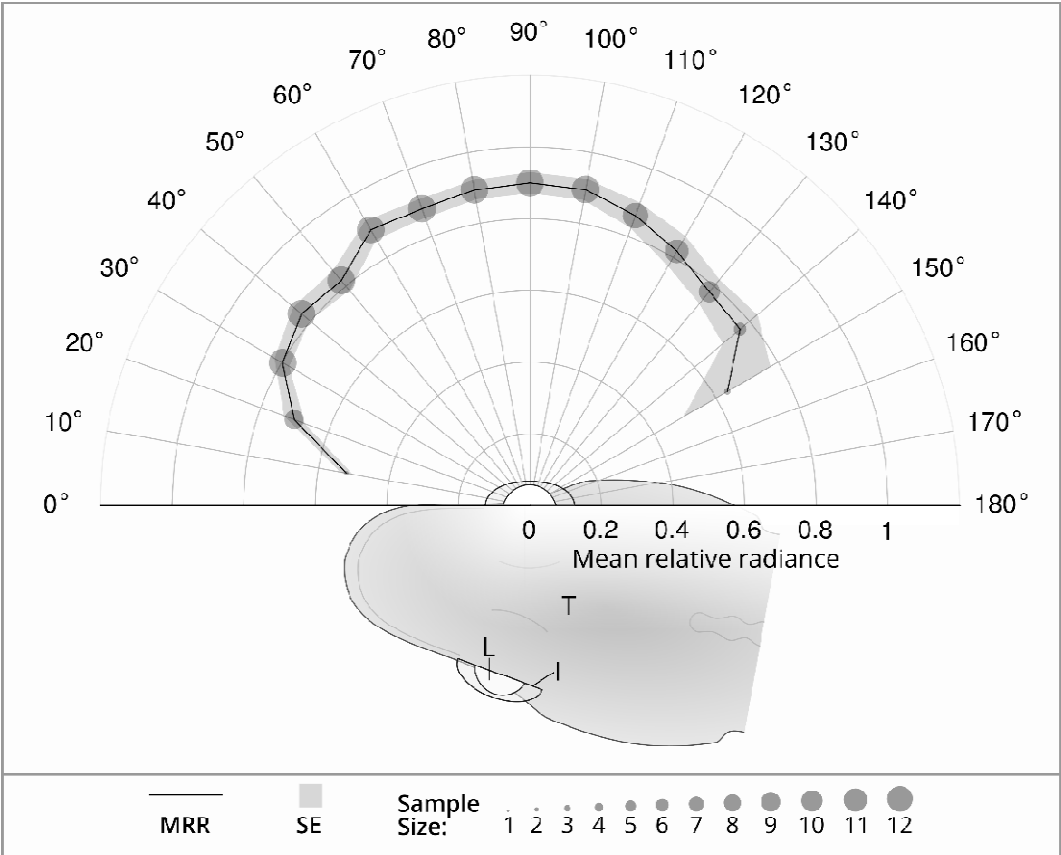

**Figure 2.** The mean relative radiance (MRR) of the blue ocular spark does not vary along the equatorial axis. MRR is represented by the solid line, the corresponding standard error (SE) by the light grey area, and the sample size of each measured angle by the size of the discs. Fish is seen from a dorsal perspective and naming scheme for angles in relation to the iris of *Tripterygion delaisi*: 90° = normal angle, 0° = angle parallel at the anterior start of the semi-circle and 180° at the posterior end. T = *T. delaisi* body, I = Iris, L = Lens.

## Results

### *Spectral properties of Cheirocratus gammarids*

Focal-stacking images revealed that the reflective units of gammarid eyes are not found in the optical pathway of the eye (**Fig. 3**), but appear to be between ommatidia akin to those described in *Pullosquilla thomassini*, *Pseudosquilla richeri*, and *Harpisquilla sp.*<sup>12</sup>. While these reflectors would not improve vision in dim light such as would *tapetum lucidum* and *stratum argenteum*<sup>41</sup>, they would normally help camouflage the gammarid eye by making the otherwise black, photon-absorbing, eye look more like the

substrate by reflecting some of the sidewelling light field<sup>12</sup>. Overall eye reflectance, within the 400 to 700 nm wavelength range and illuminated with a coaxial light source (epi-illumination), was on average 4.09 times greater than when illuminated with a light source set at 45° from normal (range = 2.68 to 9.87,  $n = 18$ ; **Fig 3**). The translucent body of the gammarids transmitted much of the light, making them well camouflaged against most backgrounds (**Fig. 3**). The pooled effects of body transmittance and non-coaxial eye reflectance allows gammarids to reduce the contrast between their eyes and the background on which they sit. However, the reflective properties of the structures between ommatidia could be utilized advantageously by triplefins generating ocular sparks.

#### *Triplefin and gammarid eye size*

From scaled pictures, we determined that triplefin pupil size averaged 0.78 mm (range 0.66 mm to 0.92 mm,  $n = 35$  fish, one eye each) and the gammarid eye size averaged 0.063 mm (range 0.021 to 0.102 mm,  $n = 11$ ).

#### *Properties of ocular sparks*

Previous work showed that the relative radiance of the average ocular spark peaks at wavelengths around 472 nm at 2.15 times that of a diffuse white standard, and that the total area under the curve between 400 and 700 nm averaged 1.34 times that of a Lambertian white standard (range 0.63 to 2.09,  $n =$  both eyes of 5 fish; data from <sup>8</sup>). The radius equivalent (area as a circular disk) of the ocular sparks ranged from 0.10 mm to 0.24 mm (mean = 0.16 mm,  $n = 10$  fish). The relative radiance of the spark was similar across all angles measured along the equatorial axis (**Fig. 2**).

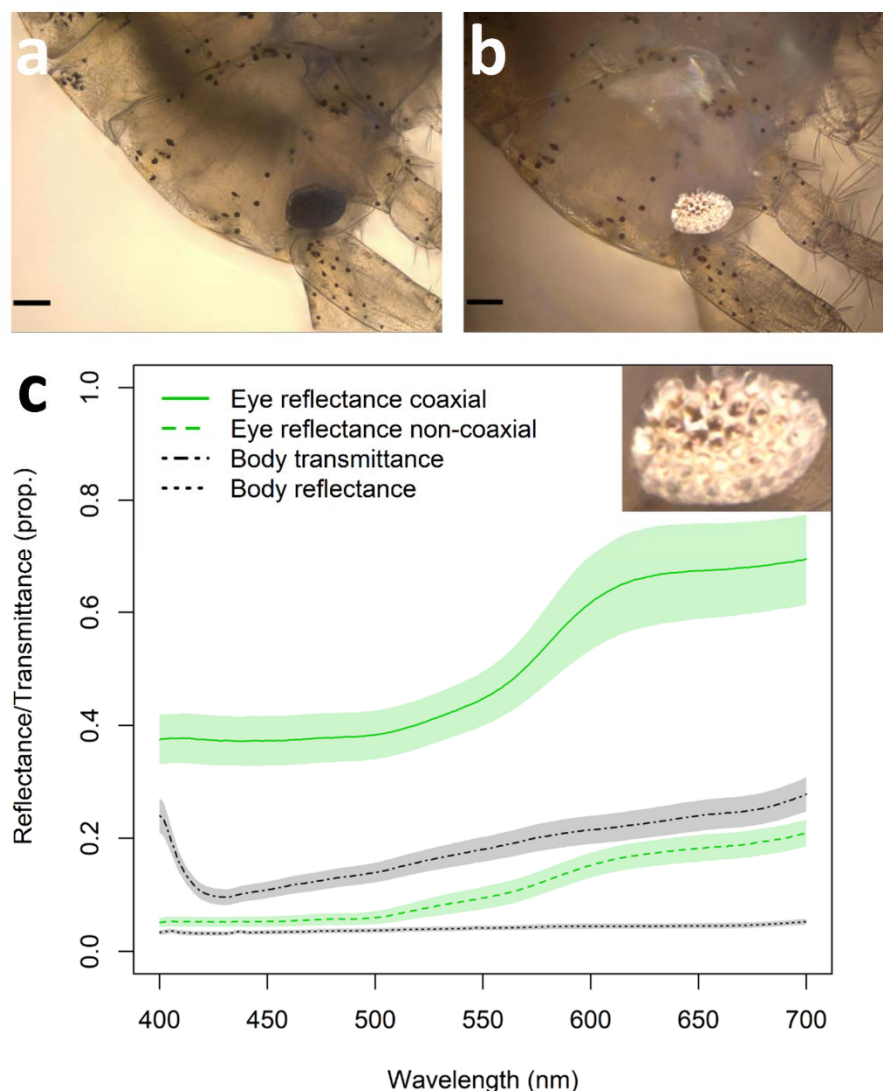

**Figure 3.** The reflectance of gammarid eyes is much greater under coaxial illumination than non-coaxial illumination. Example gammarid for which measurements of body transmission and reflectance, as well as eye reflectance were obtained; a) viewed under  $10 \times 10$  magnification using transmission illumination, scale bar is 100  $\mu\text{m}$ ; b) viewed with coaxial illumination, scale bar is 100  $\mu\text{m}$ . c) Reflectance and transmittance of the body ( $n = 19$  individuals) and eye ( $n = 18$  for coaxial and  $n = 10$  for non-coaxial reflectance); lines indicate average of measurements, shaded area indicate standard error of the mean. Inset shows that the highly reflective structures are between ommatidia. Photo credits: Pierre-Paul Bitton.

*Active photolocation of the gammarid eye*



Modelling results for optimistic calculations show that diurnal active photolocation would assist with micro-prey foraging under wide ranging conditions (**Fig. 4**) by generating perceivable achromatic contrasts (Michelson contrast higher than 0.008) in the eye of gammarids when modulating the ocular spark. A conservative Michelson contrast of 0.024 limited the parameter space under which active photolocation based on achromatic contrasts would be beneficial (**SI Fig. S1**), but demonstrated nonetheless the potential for ocular sparks to enhance prey detection at distances relevant to triplefin foraging behaviour. Chromatic contrast calculations yielded maximum values of 11 mm under only the most supportive conditions and are therefore considered ineffective for gammarid detection using blue ocular sparks (results not shown). Neither achromatic nor chromatic contrast calculations created perceivable contrasts on gammarid bodies (no detection distance above five mm, results not shown).

Under the most favourable conditions, the ocular spark could generate detectable achromatic contrasts at 45 mm distance, the maximum modelled. This distance represents almost a full body length of an average sized triplefin<sup>42</sup> and is much longer than their average striking distance (13.1 mm, Neißé and Michiels unpublished data). Under unfavourable parameter combinations, diurnal active photolocation would generate perceivable achromatic contrasts at less than 10 mm, limiting its potential to increase prey detection. In general, diurnal active photolocation would not be beneficial when triplefins forage on unshaded substrates (**Fig. 4** No shade). Under this scenario, only large and bright ocular sparks, and strong coaxial reflectance of gammarid eyes, would generate perceivable achromatic contrasts at distances greater than 10 mm. Even in poorly shaded areas, however, the ocular spark would generate perceivable contrast in the eye of gammarids at greater than 10 mm. When foraging on average or heavily-shaded substrate (**Fig. 4** third and fourth column), the distance at which active photolocation would be beneficial would greatly depend on the relationship between the coaxial and non-coaxial reflectance properties of the gammarid eyes. Under these shaded conditions, maximum

detectable distances of over 15 mm would be common, suggesting diurnal active photolocation is effective in many situations.

## Discussion

Through detailed characterization of the interaction involved in the diurnal active photolocation of gammarid prey by *T. delaisi*, we have shown that the controlled production of blue ocular sparks could assist triplefin foraging under a broad range of environmental conditions. It is important to note that active photolocation as described here is a detection enhancement mechanism, not a replacement for regular vision. A gammarid moving through the water column at short distances could obviously be detected through regular vision without any help from active photolocation. However, in the more usual situation where gammarids are well camouflaged because they are translucent and have reflective properties similar to brown algae (see Harant et al.<sup>19</sup> for algae reflectance), active photolocation could help locate the eyes of previously undetected individuals. In addition, there are many objects on the substrate - as there are in water - that may look like food items, but are not. Hence, even if triplefins detect something that looks like prey, they could decide to investigate it further before striking, maximizing their success. As such, our results are the first theoretical evidence supporting the use of diurnal light redirection in fish as a mean of improving the probability of micro-prey capture.

Furthermore, this study brings into focus the conditions that will facilitate diurnal active photolocation to increase the probability of prey detection. In short, these are: (1) the level of target shading, (2) a means by which the sender/receiver can effectively and coaxially redirect downwelling light, (3) a directionally reflective or retroreflective target, (4) short interaction distances, and (5) sufficient contrast sensitivity in the receiver. We discuss these conditions in details in the following sections.

# *Light fields*

Our modelling results determined that relatively small differences between the redirected downwelling light and the light field illuminating the gammarid would limit the distance at which ocular sparks would produce detectable contrasts in the eyes of gammarid. Indeed, all three leftmost panels in **Fig. 4** and **Fig. S1** assume that both triplefin and gammarid are directly exposed to downwelling light and show maximum detection distances of perceivable contrast no more than 1.5 cm. This may not seem like a great distance, but preliminary data on foraging triplefins indicate that they normally strike at prey from 1.31 mm on average (Niklas and Michiels, unpublished data). Furthermore, when prey are found in shade the detection distances become much greater (remaining panels in **Fig. 4** and **SI Fig. S1**), highlighting the importance of a redirected light field greater than the one illuminating the target for ocular sparks to be effective. Three complementary aspects of the ecology of triplefins and gammarids increase the probability that these favourable interaction conditions are common. First, as in all aquatic environments, the refractive power of the water-air interface constrains downwelling sunrays to a 96° cone, known as Snell's window, pointing down from the surface<sup>43</sup>. The immediate consequence is that this causes a strong difference in radiance between downwelling and sidewelling light. Second, the environment where triplefins live is very complex and 3-dimensional, generating gradients of light and shade very easily. Indeed, they are often found feeding at small micro-habitat structures such as complex algal growth and encrusting epi-growth<sup>18</sup>. Third, in general, gammarids are substrate-dwelling and only rarely swim in open water, further preferring vegetation with fissured surfaces over those with smooth surfaces<sup>44,45</sup>. Therefore, it is certainly not uncommon for triplefins exposed to direct downwelling irradiance to forage for gammarid that are shaded to a certain degree.

Various factors not considered by our models will undeniably influence the effectiveness of diurnal active photolocation. For example, small waves and wind-generated ripples on the water surface create strong spatio-temporal variation in the downwelling light field near the surface<sup>46,47</sup>. This is

observable as highly dynamic light patterns on the substrate, which can vary the irradiance intensity by an order of magnitude at scales smaller than 1 cm, with very short time intervals (milliseconds). These stochastic flashes of light could overwhelm the small differences in reflected eye radiance caused by active photolocation, thus precluding their detection by triplefins. This would be particularly true unless the contrasts generated in the gammarid eye by active photolocation varied asynchronously with the dynamic light pattern. However, both the intensity and frequency of these fluctuations are strongly attenuated as they travel through the water column<sup>47</sup>, and gradually disappear along the 5 – 30 m depth gradient. Therefore, triplefins foraging between 5 m to 30 m depth would be minimally affected by water surface movement. Of note, however, is that the role for diurnal active photolocation through ocular sparks will also decrease with increasing depth because the ratio between downwelling and sidewelling irradiance decreases due to scattering. Our study does not allow us to determine at what depth diurnal active photolocation through ocular sparks ceases to be effective, mainly because the local substrate had more influence on this ratio than depth. Indeed, the reflective quality of the local vegetative and rocky substrates (pale vs dark) can strongly affect the irradiance of any particular benthic location. The effect of dynamic light field, depth, and local environment need to be further determined to properly determine the importance of these factors in increasing or decreasing the efficiency of diurnal active photolocation.

### *Light redirection*

The ocular spark was efficient at redirecting the stronger downwelling light field into the weaker sidewelling light field. The average radiance of the sparks was greater than that of a white Lambertian reflector, but there was no evidence that the radiance of the spark varies across the range of angles measured on the equatorial axis of the body plan (**Fig. 2**). While a narrow beam of energy would increase the maximum distance of an active sensing signal, it would also limit the active space from

which animals can gather information, leaving them 'blind' in other directions<sup>48</sup>. Hence, directional emission would not be particularly advantageous in an active visual sensing system, as the exact position of the reflector would have to be known. Under these circumstances, a broad active sensing signal would be useful for scanning a large area of the visual environment for strong directional reflectors. The fact that ocular spark values radiance is similar across all angles suggests that that the reflective chromatophores have diffuse, not specular, properties. However, ocular spark values greater than that of a diffuse standard demonstrates that downwelling light is being focused onto an area smaller than the lens catchment area. By treating the effect of the lens and reflective chromatophores conjointly, it was simple to determine the emission of the spark with knowledge of the downwelling light field. Further characterization of the spark radiance across the range of angles on the vertical axis will better describe the distribution of the light field redirected by the chromatophores.

The size of the ocular spark had a large effect on the model, simply because the amount of light striking the gammarid eye is strongly dependent on the perceived size of the spark from the gammarids' perspective. However, producing larger sparks may not be possible or beneficial. The evolution of the size of the reflecting chromatophore patch on which the spark is focused, and therefore the photon radiance available for active photolocation, is probably constrained by two factors. First, the maximum amount of light that can be directed towards the chromatophore is limited by the catchment area of the lens, which depends on the size, position and degree of protrusion through the pupil. This positioning is likely to be driven much more by regular vision than active photolocation. Second, *T. delaisi* is a cryptobenthic species which has evolved colour patterns particularly well suited for camouflage. Generating a large, highly visible spark could become a disadvantage if it attracted potential predators. Indeed, larger piscivorous fish are known to be attracted to bright lures<sup>49</sup> and several such species are common in the same habitat (e.g. family Serranidae).

Ocular sparks can theoretically be produced by most fishes since a protruding lens is a general feature across teleosts<sup>50</sup>. To produce a functional spark, however, also requires a highly reflective integument where the focussed light strikes the iris. This would occur in species which display a highly localized reflective chromatophore patch, such as in *T. delaisi*, or generally highly reflective irides. In effect, ocular sparks are not the only mechanism by which species could horizontally redirect downwelling light. Completely silvery irides such as those found in zebrafish (*Danio rerio*), sticklebacks (family Gasterosteidae), and a large number of other species could redirect light without the need for focussing. The downwelling light would be reflected by the complete iris, which would redirect a large amount of light almost perfectly coaxially to the pupil. A quick survey of fish eyes under natural conditions does in fact show that light redirecting mechanisms in teleosts are common (see Figure 1 in Michiels et al.<sup>8</sup>), indicating that diurnal active photolocation could be widespread.

### *Reflective targets*

The difference between the coaxial and non-coaxial reflective properties of the inter-ommatidial structures of the gammarids eyes played an important role in determining the range of distances over which diurnal active photolocation was deemed possible. These reflectors, as those of stomatopod larvae<sup>12</sup>, behaved like imperfect mirrors showing some degree of specularity and diffuse reflectance. Under normal circumstances (i.e., vision by an animal that does not generate or redirect light from structures near its eyes) some of the sidewelling light coming from the animal's surroundings would be reflected by the invertebrate's dark eye thus reducing its contrast against the body. However, for triplefins and other fish possessing a light source near their pupil, the viewing geometry between the light source and the receiver (near-coaxial) would make the light reflection stronger.

The presence of reflecting units in the eyes of aquatic invertebrates have been demonstrated in a number of taxa<sup>24-27</sup>, indicating that the benefits of diurnal active photolocation would not be limited to

the increased probability of detecting a limited diversity of micro-prey items. While diurnal active photolocation would of course not benefit foraging in detritivores and herbivores, it could offer a substantial advantage to many predators of micro-prey found both on substrate and free floating in the water column. Inter-ommatidial reflectors are not the only mirrors found in nature<sup>11</sup>.

#### *Interaction distances*

The radiative energy emitted in active systems is returned to the sender with an inverse fourth power decrease in light with increasing target distance<sup>48</sup>. As a consequence, any doubling of distance imposes a 16-fold reduction in photon flux. As such, diurnal active photolocation can only be efficient in the context of short distance interactions measured in mm or cm. This implies, as indicated above, that only fish predators of micro-prey are expected to gain foraging advantages through active photolocation. The small scale at which these interactions occur may also help explain why this mechanism has been overlooked until now.

#### *Contrast detection*

Active photolocation cannot work if the animal redirecting and receiving the reflection of light does not have the ability to detect the changes in radiance of the reflecting structure. The detection distance calculations implemented in this study used spatial contrast sensitivity values. However, because we argue that eyes, both those of vertebrates and invertebrates, are likely targets of active photolocation, and because the radiance contrast would be generated by the on/off control of sparks or by gammarids moving their eyes, temporal contrast sensitivity values would be much more appropriate. However, studies of temporal contrast sensitivity are uncommon, especially in non-humans. The limited results indicate that contrast detection of a flickering point in space is influenced, among others, by the size of the stimulus, the amount of ambient light, and the continuity of the field and surround<sup>51,52</sup>. In

humans<sup>51,53,54</sup> as in goldfish<sup>55</sup> (*Carassius auratus*), the flicker frequency is also an important factor, with contrast sensitivity peaking at around 5-10 Hz in humans but ~ 2-5 Hz in goldfish. At these frequencies, the temporal contrast sensitivity is very similar to the spatial contrast sensitivity, for which data is available from more species, including *T. delaisi*<sup>35</sup>. Furthermore, when attention is paid to the stimulus, temporal contrast sensitivity increases, at least in humans<sup>56</sup>, suggesting the possibility that fish searching for a flickering light caused by their own redirected light could be highly sensitive to a blinking area. In part, this justifies the use of a spatial contrast sensitivity value for assessing a temporal contrast, particularly because we also present results using a conservative threshold of 3 times the measured value. There is no doubt, however, that more research is needed on non-human temporal contrast sensitivity, the factors that may influence it, and its relation with active photolocation.

## Conclusion

Overall, our results describe how active photolocation through blue ocular sparks in the diurnal triplefin *Triptygion delaisi* could assist in the detection of prey items at relevant foraging distances. We conclude that diurnal active photolocation by means of ocular sparks can supplement regular vision by making the highly reflective eye of potential prey targets shine under nearly-coaxial illumination. Given the high number of fish species that have both protruding lenses and highly reflective irides, active photolocation could be widespread among fish, and an important, yet previously disregarded, vision enhancement mechanism.



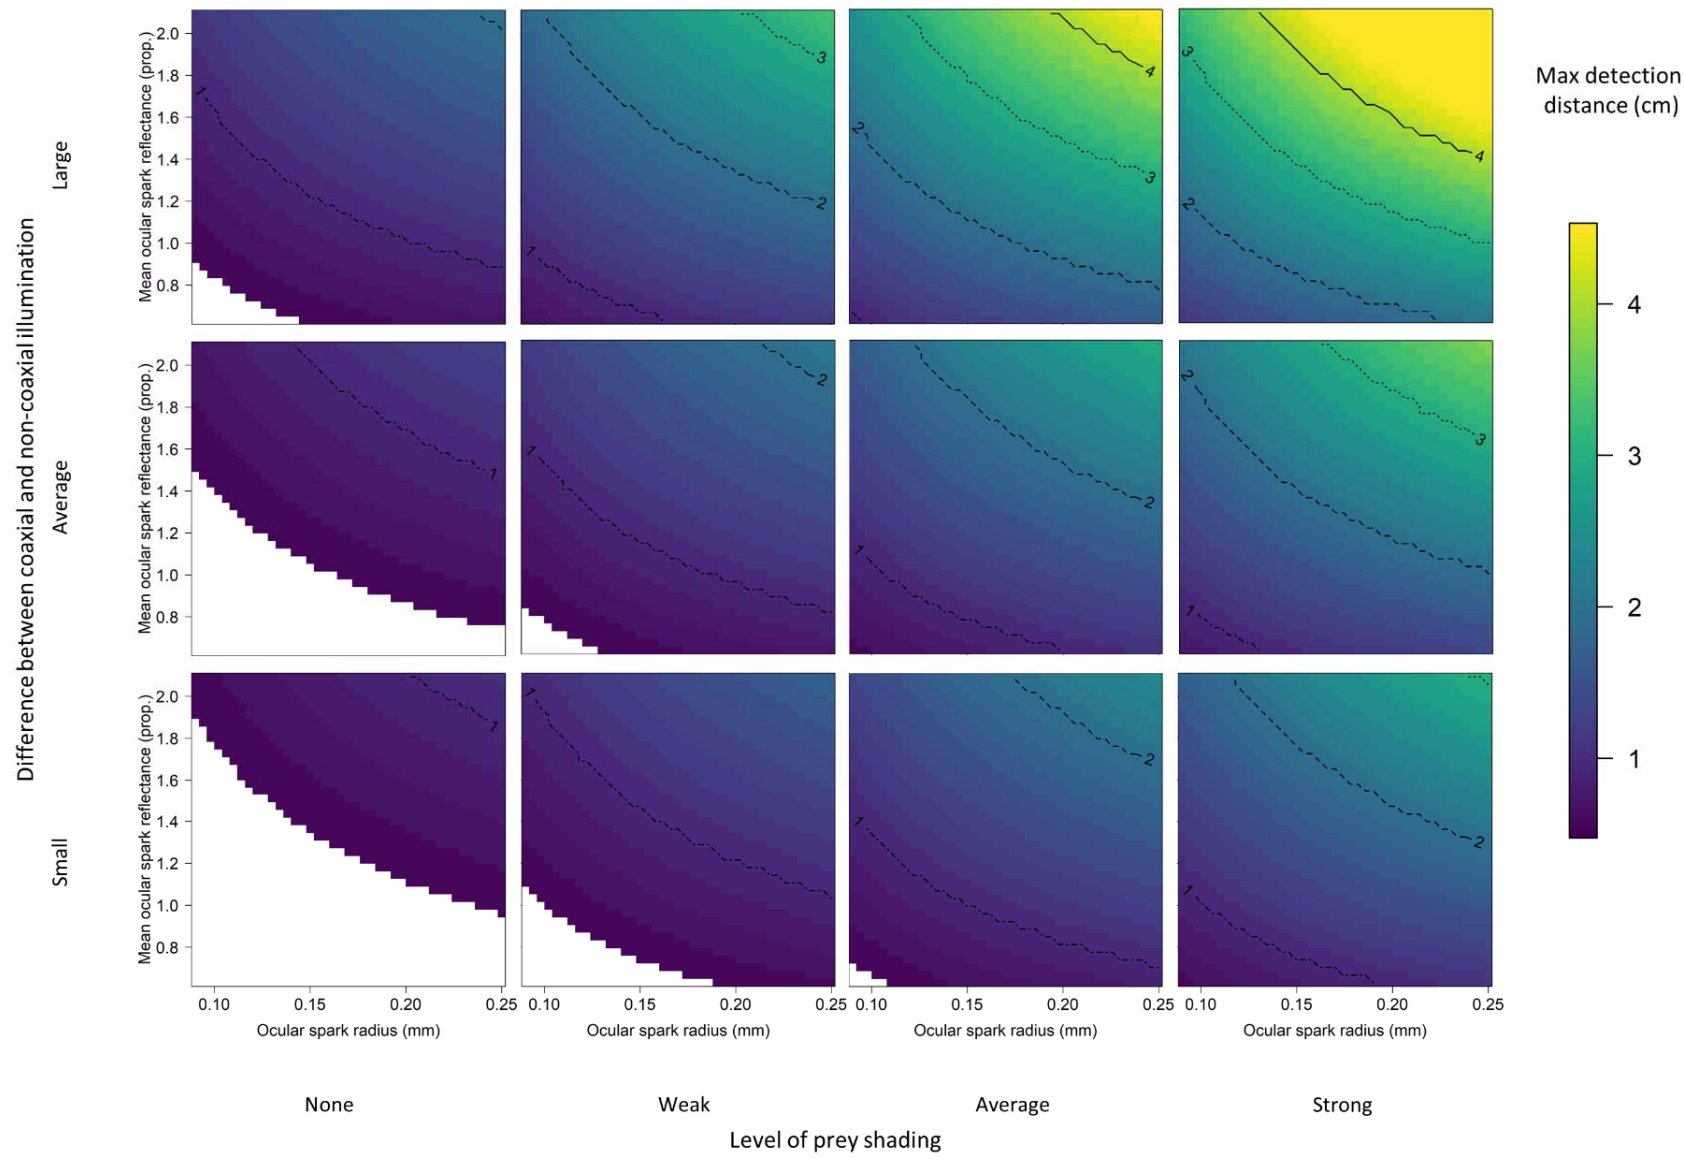

**Figure 4.** Maximum detection distances of the eye of gammarids by means of blue ocular spark reflectance by triplefins under varying scenarios with Michelson contrast sensitivity set at 0.008. Top, middle, and bottom rows were obtained by varying the relationship between the reflectance of gammarid eyes with coaxial epi-illumination and at 45° from normal. Whereas triplefins were always in the sun, gammarids were tested under four scenarios of shading (columns) in which the prey item is located (See Material and Methods). Conditions in which active photolocation would not assist in gammarid detection are in white.

## References

- 1 Pierce, G. W. & Griffin, D. R. Experimental determination of supersonic notes emitted by bats. *Journal of Mammalogy* **19**, 454-455 (1938).
- 2 Griffin, D. R., Webster, F. A. & Michael, C. R. The echolocation of flying insects by bats. *Anim Behav* **8**, 141--154 (1960).
- 3 Caputi, A. A. & Budelli, R. Peripheral electrosensory imaging by weakly electric fish. *J Comp Physiol A* **192**, 587-600, doi:10.1007/s00359-006-0100-2 (2006).
- 4 Rasnow, B. The effects of simple objects on the electric field of *Apteronotus*. *Journal of Comparative Physiology a-Sensory Neural and Behavioral Physiology* **178**, 397-411 (1996).
- 5 Kenaley, C. P., DeVaney, S. C. & Fjeran, T. T. The complex evolutionary history of seeing red: Molecular phylogeny and the evolution of an adaptive visual system in deep-sea dragonfishes (Stomiiformes: Stomiidae). *Evolution* **68**, 996-1013, doi:10.1111/evo.12322 (2014).
- 6 Hellinger, J. *et al.* The flashlight fish *Anomalops katoptron* uses bioluminescent light to detect prey in the dark. *Plos One* **12**, e0170489, doi:10.1371/journal.pone.0170489 (2017).
- 7 Sutton, T. T. Trophic ecology of the deep-sea fish *Malacosteus niger* (Pisces : Stomiidae): An enigmatic feeding ecology to facilitate a unique visual system? *Deep-Sea Res Pt I* **52**, 2065-2076, doi:10.1016/j.dsr.2005.06.011 (2005).
- 8 Michiels, N. K. *et al.* Controlled ocular radiance in a diurnal fish looking at prey. *Royal Society Open Science* **5**, 170838, doi:10.1098/rsos.170838 (2018).
- 9 Johnsen, S. *The optics of life : a biologist's guide to light in nature*. (Princeton University Press, 2012).
- 10 Marshall, J. & Johnsen, S. Fluorescence as a means of colour signal enhancement. *Philos T R Soc B* **372**, doi:ARTN 20160335 10.1098/rstb.2016.0335 (2017).
- 11 Land, M. F. & Nilsson, D.-E. *Animal eyes*. 2nd edn, (Oxford University Press, 2012).
- 12 Feller, K. D. & Cronin, T. W. Hiding opaque eyes in transparent organisms: a potential role for larval eyeshine in stomatopod crustaceans. *J Exp Biol* **217**, 3263-3273, doi:10.1242/jeb.108076 (2014).
- 13 Land, M. F. The physics and biology of animal reflectors. *Progress in biophysics and molecular biology* **24**, 75-106 (1972).
- 14 Santon, M., Bitton, P.-P., Harant, U. K. & Michiels, N. K. Daytime eyeshine contributes to pupil camouflage in a cryptobenthic marine fish. *Sci Rep-Uk* **8**, 7368 (2018).
- 15 Shelton, P. M. J., Gaten, E. & Herring, P. J. Adaptations of tapeta in the eyes of mesopelagic decapod shrimps to match the oceanic irradiance distribution. *J Mar Biol Assoc Uk* **72**, 77-88 (1992).
- 16 Howland, H. C., Murphy, C. J. & Mccosker, J. E. Detection of eyeshine by flashlight fishes of the family Anomalopidae. *Vision Res* **32**, 765-769, doi:Doi 10.1016/0042-6989(92)90191-K (1992).

536 17 Nicol, J. A. C. Spectral composition of the light of the lantern-fish, *Myctophum punctatum*. *J Mar*  
537 *Biol Assoc Uk* **39**, 27-32 (1960).

538 18 Zander, C. D. Feeding ecology of littoral gobiid and blennioid fish of the Banyuls area  
539 (Mediterranean Sea) I. Main food and trophic dimension of niche and ecotope. *Vie et Milieu* **32**,  
540 1-10 (1982).

541 19 Harant, U. K. *et al.* Do the fluorescent red eyes in the marine fish *Tripterygion delaisi* stand out?  
542 In situ and in vivo measurements at two depths. *Ecology and Evolution* **8**, 4685-4694 (2018).

543 20 Bitton, P. P. *et al.* Red fluorescence of the triplefin *Tripterygion delaisi* is increasingly visible  
544 against background light with increasing depth. *Royal Society Open Science* **4**, 161009 (2017).

545 21 Louisy, P. *Europe and Mediterranean marine fish identification guide*. (Ulmer, 2015).

546 22 Zander, C. D. & Heymer, A. *Tripterygion tripteronotus* (Risso 1810) und *Tripterygion xanthosoma*  
547 *tartessicum*, eine ökologische Speziation. *Vie et Milieu Serie A-Biologie Marine* **21**, 363-394  
548 (1970).

549 23 Cronin, T. W. & Jinks, R. N. Ontogeny of vision in marine crustaceans. *Am Zool* **41**, 1098-1107,  
550 doi:Doi 10.1668/0003-1569(2001)041[1098:Oovimc]2.0.Co;2 (2001).

551 24 Douglass, J. K. & Forward, R. B. The ontogeny of facultative superposition optics in a shrimp eye  
552 - Hatching through metamorphosis. *Cell Tissue Res* **258**, 289-300 (1989).

553 25 Harzsch, S., Benton, J., Dawirs, R. R. & Beltz, B. A new look at embryonic development of the  
554 visual system in decapod crustaceans: Neuropil formation, neurogenesis, and apoptotic cell  
555 death. *J Neurobiol* **39**, 294-306, doi:Doi 10.1002/(Sici)1097-4695(199905)39:2<294::Aid-  
556 Neu13>3.3.Co;2-H (1999).

557 26 Williams, B. G., Greenwood, J. G. & Jillett, J. B. Seasonality and duration of the developmental  
558 stages of *Heterosquilla tricarinata* (Claus, 1871) (Crustacea, Stomatopoda) and the replacement  
559 of the larval eye at metamorphosis. *B Mar Sci* **36**, 104-114 (1985).

560 27 Nilsson, D. E. & Nilsson, H. L. Eye camouflage in the isopod crustacean *Astacilla longicornis*  
561 (Sowerby). *J Exp Mar Biol Ecol* **68**, 105-110, doi:Doi 10.1016/0022-0981(83)90153-3 (1983).

562 28 Abràmoff, M. D., Magalhães, P. J. & Ram, S. J. Image processing with ImageJ. *Biophotonics*  
563 *International* **11**, 36-42 (2004).

564 29 Whitcher, R. A Monte Carlo method to calculate the average solid angle subtended by a right  
565 cylinder to a source that is circular or rectangular, plane or thick, at any position and orientation.  
566 *Radiation protection dosimetry* **118**, 459-474 (2006).

567 30 Fritsch, R., Collin, S. P. & Michiels, N. K. Anatomical analysis of the retinal specializations to a  
568 crypto-benthic, micro-predatory lifestyle in the mediterranean triplefin blenny *Tripterygion*  
569 *delaisi*. *Front Neuroanat* **11**, doi:ARTN 122 10.3389/fnana.2017.00122 (2017).

570 31 Vorobyev, M. & Osorio, D. Receptor noise as a determinant of colour thresholds. *P Roy Soc B-*  
571 *Biol Sci* **265**, 351-358 (1998).

572 32 Govardovskii, V. I., Fyhrquist, N., Reuter, T., Kuzmin, D. G. & Donner, K. In search of the visual  
573 pigment template. *Visual Neurosci* **17**, 509-528, doi:10.1017/S0952523800174036 (2000).

574 33 Wilkins, L., Marshall, N. J., Johnsen, S. & Osorio, D. Modelling fish colour constancy, and the  
575 implications for vision and signalling in water. *J Exp Biol*, jeb-139147 (2016).

576 34 Matz, M. V., Marshall, N. J. & Vorobyev, M. Are corals colorful? *Photochemistry and*  
577 *Photobiology* **82**, 345-350 (2006).

578 35 Santon, M., Münch, T. A. & Michiels, N. K. The contrast sensitivity function of a small  
579 cryptobenthic marine fish. *Journal of Vision* (In Press).

580 36 Douglas, R. H. & Hawryshyn, C. W. in *The visual system of fish* (eds R. H. Douglas & M. B. A.  
581 Djamgoz) Ch. 11, 373-418 (Chapman Hall, 1990).

582 37 Hester, F. J. Visual contrast thresholds of the goldfish (*Carassius auratus*). *Vision Res* **8**, 1315-  
583 1335 (1968).

584 38 Muntz, W. R. A. & Northmore, D. P. M. Vision and visual pigments in a fish, *Scardinius*  
585 *erythrophthalmus* (Rudd). *Vision Res* **10**, 281-298, doi:Doi 10.1016/0042-6989(70)90100-8  
586 (1970).

587 39 Anthony, P. D. Visual contrast thresholds in the cod *Gadus morhua* L. *J Fish Biol* **19**, 87-103,  
588 doi:DOI 10.1111/j.1095-8649.1981.tb05814.x (1981).

589 40 Hawryshyn, C. W., Arnold, M. G., Mcfarland, W. N. & Loew, E. R. Aspects of color-vision in  
590 Bluegill sunfish (*Lepomis macrochirus*) - Ecological and evolutionary relevance. *Journal of*  
591 *Comparative Physiology a-Sensory Neural and Behavioral Physiology* **164**, 107-116, doi:Doi  
592 10.1007/Bf00612724 (1988).

593 41 Fritsch, R., Ullmann, J. F. P., Bitton, P. P., Collin, S. P. & Michiels, N. K. Optic-nerve-transmitted  
594 eyeshine, a new type of light emission from fish eyes. *Frontiers in Zoology* **14**, doi:ARTN 14  
595 10.1186/s12983-017-0198-9 (2017).

596 42 De Jonge, J. & Videler, J. J. Differences between the reproductive biologies of *Tripterygion*  
597 *tripteronotus* and *Tripterygion delaisi* (Pisces, Perciformes, Tripterygiidae) - the adaptive  
598 significance of an alternative mating strategy and a red instead of a yellow nuptial color. *Mar*  
599 *Biol* **100**, 431-437 (1989).

600 43 Lythgoe, J. N. *The ecology of vision*. (Oxford University Press, 1979).

601 44 Kley, A. *et al.* Influence of substrate preference and complexity on co-existence of two non-  
602 native gammarideans (Crustacea: Amphipoda). *Aquat Ecol* **43**, 1047-1059, doi:10.1007/s10452-  
603 009-9242-y (2009).

604 45 Kaldonski, N., Lagrue, C., Motreuil, S., Rigaud, T. & Bollache, L. Habitat segregation mediates  
605 predation by the benthic fish *Cottus gobio* on the exotic amphipod species *Gammarus roeseli*.  
606 *Naturwissenschaften* **95**, 839-844, doi:10.1007/s00114-008-0392-x (2008).

607 46 You, Y., Stramski, D., Darecki, M. & Kattawar, G. W. Modeling of wave-induced irradiance  
608 fluctuations at near-surface depths in the ocean: a comparison with measurements. *Appl Optics*  
609 **49**, 1041-1053, doi:10.1364/Ao.49.001041 (2010).

610 47 Darecki, M., Stramski, D. & Sokolski, M. Measurements of high-frequency light fluctuations  
611 induced by sea surface waves with an Underwater Porcupine Radiometer System. *J Geophys*  
612 *Res-Oceans* **116**, doi:Artn C00h09 10.1029/2011jc007338 (2011).

613 48 Nelson, M. E. & MacIver, M. A. Sensory acquisition in active sensing systems. *J Comp Physiol A*  
614 **192**, 573-586, doi:10.1007/s00359-006-0099-4 (2006).

615 49 Moraga, A. D., Wilson, A. D. M. & Cooke, S. J. Does lure colour influence catch per unit effort,  
616 fish capture size and hooking injury in angled largemouth bass? *Fish Res* **172**, 1-6,  
617 doi:10.1016/j.fishres.2015.06.010 (2015).

618 50 Walls, G. L. *The vertebrate eye and its adaptive radiation*. (Hafner Pub. Co., 1963).

619 51 Wooten, B. R., Renzi, L. M., Moore, R. & Hammond, B. R. A practical method of measuring the  
620 human temporal contrast sensitivity function. *Biomed Opt Express* **1**, 47-58, doi:Doi  
621 10.1364/Boe.1.000047 (2010).

622 52 Keesey, U. T. Variables Determining Flicker Sensitivity in Small Fields. *J Opt Soc Am* **60**, 390-&,  
623 doi:Doi 10.1364/Josa.60.000390 (1970).

624 53 Kelly, D. H. Visual responses to time-dependent stimuli .3. Individual variations. *J Opt Soc Am* **52**,  
625 89-&, doi:Doi 10.1364/Josa.52.000089 (1962).

626 54 Kelly, D. H. Visual responses to time-dependent stimuli .1. Amplitude sensitivity measurements.  
627 *J Opt Soc Am* **51**, 422-&, doi:Doi 10.1364/Josa.51.000422 (1961).

628 55 Bilotta, J., Lynd, F. M. & Powers, M. K. Effects of mean luminance on goldfish temporal contrast  
629 sensitivity. *Vision Res* **38**, 55-59, doi:Doi 10.1016/S0042-6989(97)00162-4 (1998).

630 56 Motoyoshi, I. Attentional modulation of temporal contrast sensitivity in human vision. *Plos One*  
631 **6**, doi:ARTN e19303 10.1371/journal.pone.0019303 (2011).

632

# 633 **Acknowledgements**

634 We thank the staff at STARESO, especially Corrine Pelaprat for assistance with identification of  
635 gammarids, and Oeli Oelkrug for fish maintenance at the University of Tübingen. This project was  
636 funded by the German Science Foundation Koselleck grant (Mi 482/13-1) and the Volkswagen  
637 Foundation (Az. 89148 and Az. 91816) to N.K.M. as well as running support by the University of  
638 Tübingen. P-P.B. was funded by the Natural Sciences and Engineering Research Council of Canada in the  
639 form of a Postdoctoral Fellowship (471704 - 2015).

640

641 **Author contribution** PPB and NKM conceptualized the study. All authors collected data. PPB, SYC  
642 analyzed data. PPB, SYC, and NKM wrote the manuscript, and all authors edited the manuscript.

643

644 **Author Declaration** The authors declare no conflict of interest.
